# Supplementary material
Source: PubMed Central journal article supplement (PMC4262645)
Supplement: NIHMS631439-supplement-02.pdf [file NIHMS631439-supplement-02.pdf]

**Supplementary Table 1:** Effect of high-dose dexamethasone on genes, linked with cell-cycle, MAPK signaling (MKS), and glucocorticoid activation (GCS), that exhibit significance

| Rabbit       | Rabbit Description                                                                    | %   | Human    | CAT     | X         | P     |
|--------------|---------------------------------------------------------------------------------------|-----|----------|---------|-----------|-------|
| A4 RABIT     | Amyloid beta A4 protein                                                               | 97  | APP      | CCR     | 1.78      | 0.035 |
| ANXA1 RABIT  | Annexin A1                                                                            | 88  | ANXA1    | CCR     | 1.54      | 0.013 |
| ARPP19       | cAMP-regulated phosphoprotein,19kDa                                                   | 99  | ARPP19   | CCR     | 1.57      | 0.013 |
| CASP3_RABIT  | Caspase-3Caspase-3 subunit p17 Caspase-3 subunit p12                                  | 90  | CASP3    | CCR     | -<br>2.24 | 0.023 |
| ERCC3        | Excision repair cross-complementing rodent repair deficiency, complementation group 3 | 98  | ERCC3    | CCR     | 1.58      | 0.005 |
| KS6B1_RABIT  | Ribosomal protein S6 kinase beta-1                                                    | 97  | RPS6K B1 | CCR     | 1.76      | 0.043 |
| LOC100349119 | CDC28 protein kinase 2                                                                | N/A | N/A      | CCR     | -1.5      | 0.015 |
| PLK2         | Polo-like kinase 2                                                                    | 97  | PLK2     | CCR     | 1.78      | 0.042 |
| Q6UUW3       | Multi-drug resistance P-glycoprotein 1                                                | 88  | ABCB1    | CCR     | 2.44      | 0.001 |
| RAB11A       | Nag26c07.y1Rabbit eye minus lens and cornea.                                          | 100 | RAB11A   | CCR     | 1.79      | 0.036 |
| RRP8         | Ribosomal RNA processing 8, methyltransferase, homolog (yeast)                        | 81  | RRP8     | CCR     | 1.58      | 0.039 |
| SESN1        | Sestrin 1                                                                             | 94  | SESN1    | CCR     | 1.63      | 0.025 |
| TERF1        | Telomeric repeat binding factor (NIMA-interacting)1                                   | 80  | TERF1    | CCR     | 1.79      | 0.003 |
| TPD52L1      | Tumor protein D52-like 1                                                              | 93  | TPD52L 1 | CCR     | 1.66      | 0.046 |
| TSG101       | Tumor susceptibility gene 101                                                         | 99  | TSG101   | CCR     | 1.97      | 0.036 |
| USP47        | Ubiquitin specific peptidase 47                                                       | 98  | USP47    | CCR     | 1.59      | 0.031 |
| GCR_RABIT    | Glucocorticoid receptor                                                               | 88  | NR3C1    | GCS     | -<br>1.66 | 0.017 |
| BMP4_RABIT   | Bone morphogenetic protein4                                                           | 97  | BMP4     | CCR-MKS | 1.87      | 0.023 |
| AGT          | Angiotensinogen (serpin peptidase inhibitor,clade A, member 8)                        | 67  | AGT      | MKS     | 1.72      | 0.028 |
| ATP6AP2      | ATPase,H <sup>+</sup> -transporting,lysosomal accessory protein 2                     | 93  | ATP6AP 2 | MKS     | 1.64      | 0.004 |
| CAV1_RABIT   | Caveolin-1                                                                            | 96  | CAV1     | MKS     | 1.67      | 0.034 |
| LOC100009484 | Endothelial differentiation gene 7 protein                                            | 94  | LPAR3    | MKS     | -<br>1.67 | 0.014 |
| MAP2K4       | Mitogen-activated protein kinase kinase 4                                             | 100 | MAP2K 4  | MKS     | 1.60      | 0.047 |
| NENF         | Neudesin neurotrophic factor                                                          | 85  | NENF     | MKS     | 1.54      | 0.000 |
| Q95JB2-RABIT | Tyrosine kinase-related protein                                                       | 91  | RYK      | MKS     | 1.51      | 0.031 |
| ZNF622       | Zinc finger protein 622                                                               | 88  | ZNF622   | MKS     | 1.50      | 0.004 |

% = percent homology with the corresponding human gene. **CAT** = categories of CCR (cell cycle), MKS (MAPK signaling), GCS (GC signaling), **X** = fold-change (negative for down-regulation), **P** = p-value (Student *t*-test) for dexamethasone vs. vehicle controls.

**Supplemental Table 2: Neurobehavioral evaluation of GCs-treated pups compared to saline-treated controls at postnatal d 21**

| Tests            |                                                                                                         | Saline Control<br>(n =11) | Dexa High-dose<br>(n = 11) |
|------------------|---------------------------------------------------------------------------------------------------------|---------------------------|----------------------------|
| Cranial Nerve    | Aversive response to alcohol                                                                            | 3(3,3)                    | 3(3,3)                     |
|                  | Sucking and Swallowing                                                                                  | 3(3,3)                    | 3(3,3)                     |
|                  | Vision                                                                                                  | 3(3,3)                    | 3(3,3)                     |
| Motor            | <b>Motor activity</b>                                                                                   |                           |                            |
|                  | Head                                                                                                    | 3(3,3)                    | 3(2,3)                     |
|                  | Fore legs                                                                                               | 3(3,3)                    | 3(2,3)                     |
|                  | Hind legs                                                                                               | 3(3,3)                    | 2(2,3)                     |
|                  | Righting reflex <sup>a</sup>                                                                            | 5(5,5)                    | 5(5,5)                     |
|                  | Locomotion on 30° inclination <sup>b</sup>                                                              | 3(3,3)                    | 3(3,3)                     |
|                  | Tone in Forelimb <sup>c</sup>                                                                           | 0 (0,0)                   | 0 (0,0)                    |
|                  | Tone in Hind limb <sup>c</sup>                                                                          | 0 (0,0)                   | 0 (0,0)                    |
|                  | Inability to hold their position at 60° inclination (average latency to slip down the slope in seconds) | 31.4                      | 25.7                       |
|                  | Distance walked in 60s (mean in inches)                                                                 | 165                       | 157.8                      |
|                  | Posture                                                                                                 | 4(4,4)                    | 4(4,4)                     |
|                  | Gait                                                                                                    | 4(4,4)                    | 4(4,4)                     |
| Motor impairment | Weakness in extremities,% <sup>d</sup>                                                                  | 0%                        | 9%                         |
| Sensory          |                                                                                                         |                           |                            |
|                  | Facial touch                                                                                            | 3(3,3)                    | 3(3,3)                     |
|                  | Pain                                                                                                    | 3(3,3)                    | 3(3,3)                     |

Values are median and interquartile range. Zero is the no response, and 3 is the normal response.

<sup>a</sup>Score (range, 1–5): no. of times turns prone within 2 s when placed in supine out of five tries.

<sup>b</sup>Score (range, 0 –3): 0, does not walk; 1, takes a few steps (less than 8 inches); 2, walks for 9 –18inches; 3, walks very well beyond 18 inches.

<sup>c</sup>Score (range, 1–3): 0, no increase in tone; 1, slight increase in tone; 2, considerable increase in tone; 3, limb rigid in flexion or extension.

<sup>d</sup>Motor impairment was defined as weakness in either fore- or hind-legs, score for gait 2 or less, and distance walked less than 80 inches in 60 seconds. [Values are expressed as %.](#)
